# Supplementary material for: Prognostic value and therapeutic potential of IAP family in head and neck squamous cell carcinoma
Source: Aging (Albany NY). 2024 Feb 15;16(4):3674–93. doi: 10.18632/aging.205551 (PMC10929838; doi:10.18632/aging.205551)
Supplement: Supplementary Table 1 [file aging-16-205551-s001.xlsx]

## Sheet: Sheet1
Supplementary Table 1. The co-expression genes of the IAP family members.
Gene	Cytoband	Altered group	Unaltered group	Altered group	Unaltered group	Log2 Ratio	p-Value	q-Value
BIRC3	11q22.2	9.17	8.4	1.82	1.26	0.77	5.93e-07	0.00493
PAK3	Xq23	2.01	1.38	1.74	1.3	0.62	2.92e-05	0.0731
PTPRZ1	7q31.32	10.25	10.88	1.91	1.41	-0.64	9.46e-05	0.0884
SERPINB3	18q21.33	10.38	11.34	2.81	2.53	-0.97	0.000135	0.092
RNASE10	14q11.2	3.31	4.12	2.25	2.29	-0.81	0.000147	0.092
CFAP300	11q22.1	4	3.4	1.89	1.39	0.6	0.000197	0.116
ABCG4	11q23.3	3.5	4.07	1.56	1.77	-0.56	0.000245	0.123
SERPINB4	18q21.33	8.74	9.69	2.91	2.6	-0.96	0.000267	0.123
IL17REL	22q13.33	2.09	1.33	2.52	1.65	0.76	0.000277	0.123
LINC02910	20q13.33	2.65	3.36	2.07	2.14	-0.71	0.000288	0.123
PGLYRP3	1q21.3	6.84	7.56	2.24	1.93	-0.72	0.000306	0.123
ZNHIT2	11q13.1	5.26	6.53	4.06	3.22	-1.27	0.000309	0.123
KRT6A	12q13.13	17.42	18.02	1.95	1.49	-0.6	0.000318	0.123
ELMOD1	11q22.3	2.08	2.64	1.68	1.7	-0.56	0.000397	0.135
HOMER2	15q25.2	8.51	9.01	1.63	1.32	-0.5	0.000483	0.142
NGEF	2q37.1	7	7.61	1.93	1.77	-0.61	0.000489	0.142
ALOX12	17p13.1	5.78	6.51	2.14	2.38	-0.72	0.000534	0.149
SP5	2q31.1	3.17	2.59	1.93	1.66	0.58	0.000699	0.164
CA12	15q22.2	11.65	12.16	1.78	1.38	-0.51	0.00078	0.165
PNLIPRP3	10q25.3	4.77	5.8	3.3	3.31	-1.04	0.000807	0.165
RAET1L	6q25.1	6.3	6.85	1.71	1.81	-0.55	0.000822	0.165
ARNT2	15q25.1	7.22	6.64	1.94	1.67	0.57	0.000855	0.166
SYTL5	Xp11.4	3.95	4.66	2.28	2.24	-0.71	0.000863	0.166
FER1L6	8q24.13	3.42	4.15	2.49	2.21	-0.74	0.000951	0.168
DYNAP	18q21.2	1.97	2.73	2.2	2.83	-0.75	0.00104	0.168
CCL13	17q12	5.85	5.32	1.7	1.76	0.52	0.00115	0.168
IL13RA2	Xq23	3.88	3.22	2.3	2.04	0.67	0.0012	0.168
SLC39A2	14q11.2	6.38	7.02	2.22	1.96	-0.64	0.00122	0.168
BPIFC	22q12.3	3.67	4.5	2.69	2.86	-0.83	0.00125	0.169
FETUB	3q27.3	3.78	4.65	2.83	2.96	-0.87	0.00128	0.17
NDRG4	16q21	8.45	9	1.84	1.8	-0.55	0.00138	0.173
CNTFR	9p13.3	3.16	3.78	2.08	2.08	-0.62	0.00139	0.173
SH3GL3	15q25.2	4.73	5.25	1.86	1.54	-0.52	0.00147	0.173
ZNF750	17q25.3	10.12	10.64	1.93	1.42	-0.52	0.00153	0.174
HS3ST5	6q21-q22.1	1.14	1.71	1.69	2.19	-0.56	0.00154	0.174
TSPAN7	Xp11.4	7.89	8.48	2.06	1.96	-0.59	0.0017	0.176
DDN	12q13.12	5.38	5.98	2.03	2.15	-0.61	0.00178	0.176
CLCA2	1p22.3	13	13.54	2.07	1.45	-0.54	0.00187	0.179
MYOM3	1p36.11	6.89	7.56	2.34	2.3	-0.67	0.00197	0.181
LINC01002	19p13.3	6.49	6.98	1.78	1.64	-0.5	0.00214	0.186
SERPINB13	18q21.33	10	10.6	2.14	2.04	-0.6	0.00221	0.188
GJB2	13q12.11	13.36	13.94	2.12	1.95	-0.59	0.00225	0.188
LRRC4	7q32.1	7.01	7.66	2.33	2.3	-0.66	0.00241	0.193
ADAMTS15	11q24.3	5.1	5.77	2.47	2.2	-0.67	0.00245	0.193
ACER1	19p13.3	2.24	2.85	2.01	2.36	-0.61	0.00259	0.193
NELL2	12q12	8.97	9.61	2.31	2.15	-0.63	0.00262	0.193
PCDHGB5	5q31	4.36	5.06	2.4	2.62	-0.69	0.0029	0.197
MLIP	6p12.1	4.29	4.84	1.97	2.02	-0.55	0.00294	0.197
RYR3	15q13.3-q14	5.21	4.67	2.01	1.79	0.54	0.00297	0.197
PCDHGC5	5q31.3	4.94	5.7	2.87	2.5	-0.76	0.00302	0.197
KRT6C	12q13.13	14.5	15.16	2.47	2.2	-0.66	0.00307	0.197
GPX2	14q23.3	9.25	10.07	3.1	2.79	-0.82	0.00339	0.204
CALB2	16q22.2	5.97	6.57	2.23	2.15	-0.6	0.00347	0.204
KRT6B	12q13.13	15.8	16.41	2.38	2.03	-0.61	0.00389	0.206
KRT14	17q21.2	17.13	17.84	2.96	2.24	-0.72	0.00441	0.211
TMPRSS11D	4q13.2	9.35	10.07	2.87	2.53	-0.73	0.00461	0.213
ENPP6	4q35.1	2.68	2.16	2.06	1.75	0.51	0.00485	0.215
GABRR1	6q15	3.18	3.74	2.2	2.01	-0.56	0.00489	0.215
SLC9A3	5p15.33	3.79	4.32	2.01	2.04	-0.53	0.00504	0.215
LIPK	10q23.31	2.96	3.53	2.15	2.23	-0.57	0.00509	0.215
PCDHB11	5q31.3	4.5	5.02	1.97	2.01	-0.52	0.00513	0.216
CEACAM6	19q13.2	9.42	10.08	2.61	2.34	-0.65	0.00541	0.218
TGM5	15q15.2	5.81	6.35	2.06	2.05	-0.53	0.00548	0.219
STXBP6	14q11.2	4.08	3.5	2.38	2.02	0.58	0.00588	0.225
SGCG	13q12.12	2.76	3.38	2.31	2.54	-0.61	0.00611	0.229
CRYAB	11q23.1	9.61	10.11	1.98	1.97	-0.51	0.00613	0.229
CPA6	8q13.2	3.61	4.16	2.19	2.15	-0.55	0.00652	0.233
ADGRB1	8q24.3	4.15	4.65	1.86	2.1	-0.5	0.00661	0.233
SLC15A1	13q32.2-q32.3	4.91	5.5	2.39	2.35	-0.6	0.0072	0.24
DUSP13	10q22.2	3.42	3.97	2.22	2.23	-0.56	0.00728	0.24
SLC16A9	10q21.2	6.88	7.44	2.31	2.08	-0.56	0.00738	0.241
PYDC1	16p11.2	1.58	1.08	2.25	1.52	0.5	0.00759	0.244
CACNG6	19q13.42	1.85	2.4	2.01	2.46	-0.55	0.00775	0.245
UNC93A	6q27	3.36	3.92	2.23	2.37	-0.57	0.00779	0.246
MYF6	12q21.31	2.51	3.28	2.85	3.43	-0.77	0.00784	0.246
IRX4	5p15.33	7.41	7.98	2.38	2.13	-0.57	0.00796	0.247
PRKAG3	2q35	2.09	2.67	2.19	2.59	-0.58	0.00802	0.247
CCNA1	13q13.3	5.66	6.38	2.89	3.01	-0.73	0.00804	0.247
FABP5	8q21.13	11.36	11.87	2.16	1.93	-0.51	0.00836	0.249
NHLH2	1p13.1	2.9	3.42	2.17	2.11	-0.52	0.00905	0.255
RDH12	14q24.1	5.86	6.53	2.75	2.77	-0.67	0.00929	0.256
GJB6	13q12.11	11.32	11.94	2.69	2.38	-0.62	0.00931	0.256
CARD18	11q22.3	3.29	3.89	2.49	2.44	-0.6	0.00934	0.257
ZBTB7C	18q21.1	8.32	8.82	2.17	1.97	-0.5	0.00987	0.262
LHX1	17q12	2.78	3.33	2.33	2.27	-0.55	0.0106	0.269
GLI2	2q14.2	6.59	7.09	2.22	1.91	-0.5	0.0109	0.271
TRIM54	2p23.3	3.37	4.08	2.85	3.22	-0.71	0.0109	0.271
CHRNG	2q37.1	2.01	2.59	2.29	2.66	-0.58	0.011	0.271
C1QTNF12	1p36.33	4.85	5.44	2.46	2.48	-0.59	0.011	0.271
ALOXE3	17p13.1	6.82	7.32	2.14	2.02	-0.5	0.0111	0.271
TCN1	11q12.1	5.75	6.49	3.22	2.95	-0.74	0.0112	0.271
PTGS2	1q31.1	9.19	8.69	2.07	2.15	0.5	0.0112	0.271
PLA2G4E	15q15.1	6.81	7.48	2.94	2.64	-0.67	0.0117	0.273
IL36G	2q14.1	8.29	8.89	2.71	2.36	-0.61	0.0119	0.273
KLK10	19q13.41	11.33	11.96	2.74	2.63	-0.63	0.0121	0.273
TNNI1	1q32.1	7.48	8.08	2.44	2.75	-0.6	0.0127	0.278
HSPB3	5q11.2	4.58	5.2	2.65	2.71	-0.62	0.0127	0.278
HHATL	3p22.1	1.83	2.43	2.45	2.87	-0.61	0.0128	0.278
EDN2	1p34.2	6.81	6.27	2.29	2.38	0.54	0.0129	0.278
PTHLH	12p11.22	10.81	11.33	2.39	1.94	-0.52	0.013	0.278
TNFRSF17	16p13.13	3.83	3.33	2.21	2.21	0.51	0.0139	0.286
CYP4F22	19p13.12	5.93	6.56	2.66	2.85	-0.63	0.0139	0.286
ARG1	6q23.2	2.34	2.97	2.53	3.04	-0.63	0.0141	0.288
DNAH11	7p15.3	3.7	3.17	2.45	2.2	0.53	0.0156	0.298
GPR15LG	10q23.1	9.36	9.94	2.67	2.46	-0.58	0.0158	0.301
NEFM	8p21.2	4.63	5.4	3.39	3.4	-0.76	0.0161	0.303
GLDC	9p24.1	5.73	5.16	2.61	2.42	0.57	0.0164	0.305
TMOD4	1q21.3	2.57	3.13	2.33	2.73	-0.56	0.0165	0.305
DDIT4L	4q24	4.18	4.76	2.58	2.69	-0.58	0.0174	0.309
TRIM63	1p36.11	3.05	3.67	2.63	3.08	-0.62	0.0183	0.315
UNC45B	17q12	3.23	3.89	2.82	3.19	-0.65	0.0184	0.316
AMTN	4q13.3	5.59	6.34	3.36	3.53	-0.75	0.0194	0.321
ADAM6	14q32.33	14.21	13.56	2.92	3.03	0.65	0.0196	0.322
PYY2	17q11.2	4.97	5.55	2.68	2.69	-0.58	0.0198	0.323
BMS1P20	22q11.22	13.43	12.91	2.42	2.42	0.53	0.0201	0.325
NEFL	8p21.2	8.13	8.79	3.23	2.76	-0.66	0.0207	0.327
TCHH	1q21.3	5.72	6.27	2.43	2.79	-0.55	0.0209	0.327
FLG2	1q21.3	3.11	3.76	2.87	3.33	-0.65	0.022	0.333
MMP13	11q22.2	8.72	9.43	3.44	3.12	-0.71	0.0222	0.333
KRT7	12q13.13	8.37	7.8	2.67	2.61	0.56	0.0227	0.334
SCEL	13q22.3	8.8	9.32	2.44	2.45	-0.52	0.0234	0.334
MYOT	5q31.2	3.61	4.29	3.08	3.52	-0.69	0.0235	0.334
MZB1	5q31.2	7.53	6.98	2.59	2.55	0.54	0.0236	0.334
CHL1	3p26.3	6.31	6.92	2.84	2.94	-0.61	0.0236	0.334
CKMT2	5q14.1	3	3.58	2.65	2.96	-0.58	0.0236	0.334
ENDOU	12q13.11	5.18	5.73	2.57	2.72	-0.55	0.0236	0.334
SPRR4	1q21.3	5.06	5.72	3.25	3.02	-0.67	0.0237	0.334
SMPX	Xp22.12	2.93	3.63	3.15	3.56	-0.7	0.0242	0.338
PPP1R27	17q25.3	3.13	3.72	2.64	3.02	-0.59	0.0245	0.339
CEACAM5	19q13.2	8.71	9.37	3.22	3.07	-0.66	0.0245	0.339
OTOP3	17q25.1	3.85	4.48	2.99	3.1	-0.63	0.0256	0.343
FLG	1q21.3	6.91	7.48	2.74	2.76	-0.57	0.0267	0.347
CHRND	2q37.1	1.93	2.51	2.64	3.08	-0.58	0.0272	0.348
CASQ2	1p13.1	4.73	5.38	3.02	3.39	-0.65	0.0272	0.348
SLC5A1	22q12.3	6.66	7.18	2.62	2.39	-0.52	0.028	0.352
KLK7	19q13.41	9.12	9.77	3.14	3.21	-0.65	0.028	0.352
STYXL2	1q24.1	2.72	3.32	2.79	3.22	-0.6	0.03	0.359
AKR1B10	7q33	10.52	11.07	2.79	2.6	-0.55	0.0306	0.361
ARPP21	3p22.3	2.25	2.83	2.71	3.13	-0.58	0.0309	0.362
CYP2W1	7p22.3	4.17	3.63	2.73	2.59	0.54	0.0309	0.362
KLK13	19q13.41	8.21	8.85	3.15	3.22	-0.63	0.0321	0.365
KLHL40	3p22.1	2.17	2.74	2.71	3.14	-0.57	0.0322	0.366
GPR50	Xq28	2.17	2.7	2.58	2.81	-0.53	0.033	0.37
EEF1A2	20q13.33	6.92	7.47	2.72	2.89	-0.55	0.0341	0.373
TNNI2	11p15.5	5.7	6.26	2.69	3.1	-0.56	0.0347	0.375
KLK11	19q13.41	9.47	9.97	2.61	2.42	-0.5	0.0352	0.377
CHGB	20p12.3	4.99	5.67	3.24	3.75	-0.67	0.0355	0.378
NEB	2q23.3	7.42	8.03	3.03	3.33	-0.61	0.0366	0.381
CXCL5	4q13.3	5.91	5.41	2.64	2.4	0.5	0.0368	0.382
LY6G6C	6p21.33	6.86	7.36	2.55	2.7	-0.51	0.0372	0.384
NMRK2	19p13.3	1.92	2.45	2.55	2.98	-0.53	0.0374	0.385
KLK9	19q13.41	7.26	7.82	2.93	2.89	-0.55	0.0409	0.395
PI3	20q13.12	12.83	13.42	3.23	2.99	-0.59	0.0438	0.401
MYOZ1	10q22.2	3.96	4.5	2.79	3.09	-0.54	0.0448	0.406
MSLN	16p13.3	7.1	6.51	3.03	3.39	0.59	0.0456	0.407
VSIG8	1q23.2	4.63	5.18	2.94	3.13	-0.55	0.0495	0.415
